# Supplementary material for: Molecular characterization of Indian pathotypes of Puccinia striiformis f. sp. tritici and multigene phylogenetic analysis to establish inter- and intraspecific relationships
Source: PubMed Central journal article supplement (PMC6415613; doi:10.1590/1678-4685-gmb-2017-0171), 2018-09-21
Supplement: 1415-4757-GMB-1678-4685-GMB-2017-0171-s003.pdf [file 1415-4757-GMB-1678-4685-GMB-2017-0171-s003.pdf]

## Supplementary Material to "Molecular characterization of Indian pathotypes of *Puccinia striiformis* f. sp. *tritici* and multigene phylogenetic analysis to establish inter- and intraspecific relationships"

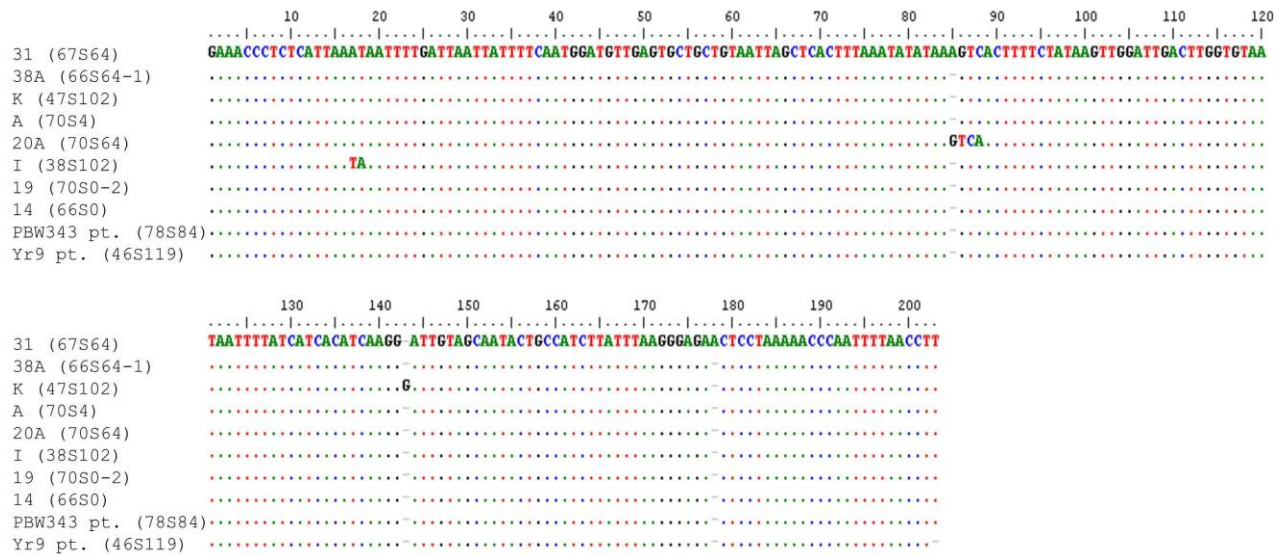

**Figure S3** - Multiple sequence alignment of internal transcribed spacer 2 (ITS2) region of 10 Indian pathotypes of *P. striiformis*.
