# Supplementary material for: Molecular characterization of Indian pathotypes of Puccinia striiformis f. sp. tritici and multigene phylogenetic analysis to establish inter- and intraspecific relationships
Source: PubMed Central journal article supplement (PMC6415613; doi:10.1590/1678-4685-gmb-2017-0171), 2018-09-21
Supplement: 1415-4757-GMB-1678-4685-GMB-2017-0171-s004.pdf [file 1415-4757-GMB-1678-4685-GMB-2017-0171-s004.pdf]

**Supplementary Material to "Molecular characterization of Indian pathotypes of *Puccinia striiformis* f. sp. *tritici* and multigene phylogenetic analysis to establish inter- and intraspecific relationships"**

**Table S1** - Details of genes and primers taken for amplification of Indian *Puccinia striiformis* f. sp. *tritici* pathotypes.

| Gene                              | Forward primer<br>(5'→3') | Reverse primer<br>(5'→3') | Product<br>length<br>(bp) | Tm (°C) |
|-----------------------------------|---------------------------|---------------------------|---------------------------|---------|
| <i>β-tubulin</i>                  | GGGTGCTGGTAACAACCTGGG     | CCGTGAATTGATCGGCCAC       | 957                       | 60.1    |
| <i>ketopantoate<br/>reductase</i> | ATCACGAAATCCTCCAAAAATC    | CTACTTTATGTCAGTGTCT       | 1500                      | 62.8    |
| <b>ITS</b>                        | TCCGTAGGTGAACCTGCGG       | TCCTCCGCTTATTGATATGC      | 600                       | 55.0    |
