# Supplementary material for: Molecular characterization of Indian pathotypes of Puccinia striiformis f. sp. tritici and multigene phylogenetic analysis to establish inter- and intraspecific relationships
Source: PubMed Central journal article supplement (PMC6415613; doi:10.1590/1678-4685-gmb-2017-0171), 2018-09-21
Supplement: 1415-4757-GMB-1678-4685-GMB-2017-0171-s005.pdf [file 1415-4757-GMB-1678-4685-GMB-2017-0171-s005.pdf]

**Supplementary Material to "Molecular characterization of Indian pathotypes of *Puccinia striiformis* f. sp. *tritici* and multigene phylogenetic analysis to establish inter- and intraspecific relationships"**

**Table S2** - NCBI sequences of ITS,  $\beta$ -tubulin, and ketopantoate reductase used for phylogenetic study

| Species                       | Isolate              | Location                | GenBank accession no. |                  |                        |
|-------------------------------|----------------------|-------------------------|-----------------------|------------------|------------------------|
|                               |                      |                         | ITS                   | $\beta$ -tubulin | Ketopantoate reductase |
| <i>P. striiformis tritici</i> | Baihua               | China                   | EU924747              | -                | -                      |
|                               | R205                 | Iran                    | EU014048              | -                | -                      |
|                               | abc1                 | Iran                    | KR230394              | -                | -                      |
|                               | voucher IRAN 11497 F | Iran                    | AY956559              | -                | -                      |
|                               | PA_2                 | Kentucky, United States | GU598104              | -                | -                      |
|                               | NYH_4                | United States           | GU598094              | -                | -                      |
|                               | JCP58                | Mexico, United States   | KT982697              | -                | -                      |
|                               | JCP58                | Mexico, United States   | KT982690              | -                | -                      |
|                               | voucher              | Sydney                  | -                     | EF570842         | -                      |
|                               | TU5S                 | China                   | -                     | FJ612005         | -                      |
|                               | PST130_8439_8        | United States           | -                     | -                | HQ698557               |
| <i>P. graminis tritici</i>    | R204                 | Iran                    | EU014047              | -                | -                      |
|                               | R203                 | Iran                    | EU014046              | -                | -                      |
|                               | 89OR436B             | United States           | DQ417380              | -                | -                      |
|                               | 68MO192-1A           | United States           | DQ417379              | -                | -                      |

|                     |                         |                              |          |          |   |
|---------------------|-------------------------|------------------------------|----------|----------|---|
|                     | 70MEX3A                 | United States                | DQ417377 | -        | - |
|                     | 80MN518-3               | United States                | DQ417376 | -        | - |
|                     | 59OH5B                  | United States                | DQ417375 | -        | - |
|                     | 57KS17-2C               | United States                | DQ417374 | -        | - |
|                     | 61PA80A                 | United States                | DQ417373 | -        | - |
|                     | 2010-001                | United States                | KJ643593 | -        | - |
|                     | 343-1,2,3,5,6           | Australia                    | -        | DQ983221 | - |
| <i>P. triticina</i> | JCP21                   | Mexico,<br>United States     | KT982689 | -        | - |
|                     | 98EGY151C               | United States                | DQ417419 | -        | - |
|                     | HSZ0748                 | United States                | DQ417416 | -        | - |
|                     | HSZ0747                 | United States                | DQ417415 | -        | - |
|                     | EGY98A                  | California,<br>United States | AY187087 | -        | - |
|                     | 00LA87                  | United States                | AF511083 | -        | - |
|                     | JCP21                   | Mexico,<br>United States     | KT982689 | -        | - |
|                     | R206                    | Belgium                      | EU014050 | -        | - |
|                     | PK-189                  | Pakistan                     | KJ934918 | -        | - |
|                     | PK-178                  | Pakistan                     | KJ934916 | -        | - |
|                     | voucher B 70<br>0012410 | Canada                       | -        | HM147312 | - |
|                     | voucher BR 59352-<br>85 | Canada                       | -        | HM147311 | - |
|                     | DAOM 240975             | Canada                       | -        | HQ317596 | - |

|                                        |                         |             |          |          |   |
|----------------------------------------|-------------------------|-------------|----------|----------|---|
|                                        | DAOM 240974             | Canada      | -        | HQ317595 | - |
|                                        | voucher                 | Australia   | -        | EF570812 | - |
|                                        | BP88134                 | Hungary     | -        | HQ317599 | - |
| <i>Uromyces euphorbiae-corniculati</i> | F425                    | Switzerland | AF180158 | -        | - |
| <i>Uromyces pisi</i>                   | E374                    | Switzerland | AF180192 | -        | - |
| <i>Uromyces viciae-fabae</i>           | voucher UME<br>LE307/03 | Australia   | -        | EF570865 | - |
| <i>Uromyces striatus</i>               | voucher DAR75753        | Australia   | -        | EF570864 | - |
